# Supplementary material for: Doxorubicin-Loaded Lipid Nanoparticles Coated with Calcium Phosphate as a Potential Tool in Human and Canine Osteosarcoma Therapy
Source: MDPI journal article supplement (doi:10.3390/pharmaceutics14071362), 2022-06-27
Supplement: s1 [file s1]

Supplementary file

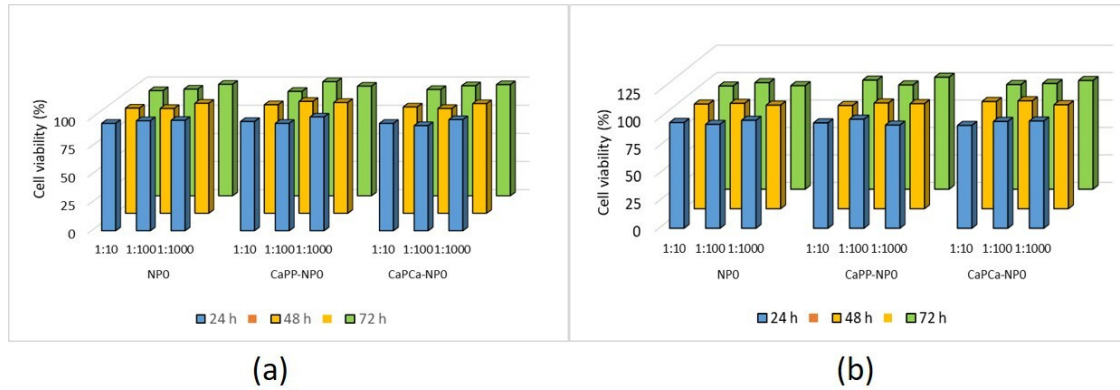

**Figure S1.** U-2OS (a) and U-2OS/DX (b) cells were incubated with NPO, CaPP-NPO and CapCa-NPO, diluted 1:10, 1:100 and 1:1000 in the cell culture medium, for 24, 48 and 72 h. Cell viability was measured by the MTT assay. Results are means  $\pm$  SD (n=3).

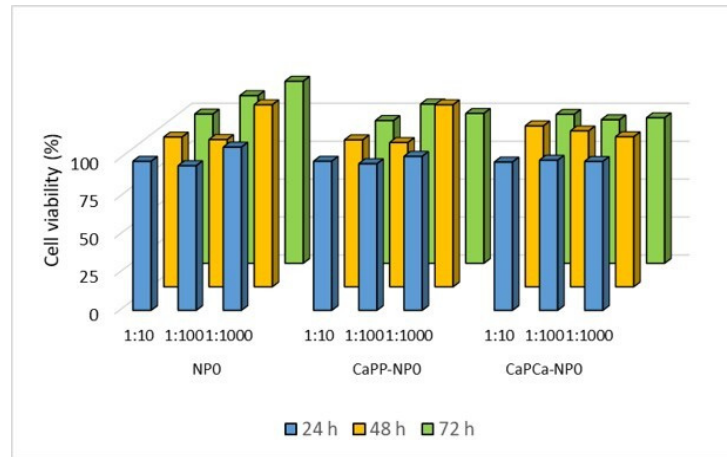

**Figure S2.** D17 cells were incubated with NPO, CaPP-NPO and CapCa-NPO, diluted 1:10, 1:100 and 1:1000 in the cell culture medium, for 24, 48 and 72 h. Cell viability was measured by the MTT assay. Results are means  $\pm$  SD (n=3).

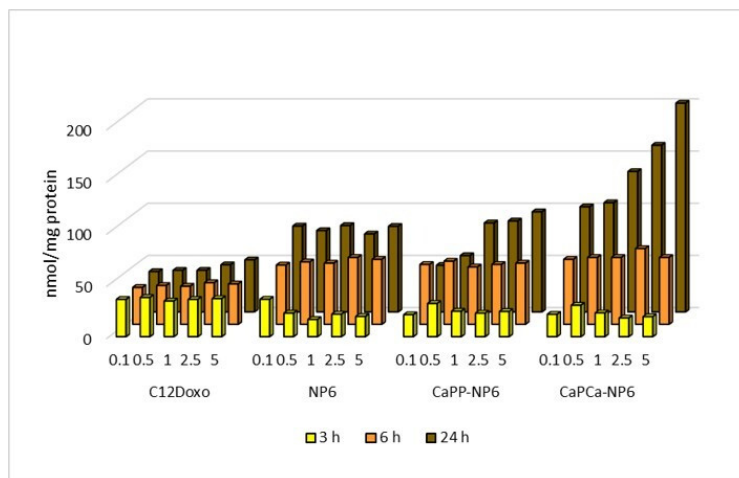

**Figure S3.** D17 cells were incubated with 0.1, 0.5, 1, 2.5 and 5 µg/mL C12DOXO or with NP6, CaP<sub>P</sub>-NP6 and Cap<sub>Ca</sub>-NP6, carrying 5 µg/mL C12 DOXO, for 1, 3, 6 and 24 h. Intracellular retention of DOXO was measured spectrofluorimetrically. Results are means ± SD (n=3).
